# Supplementary material
Source: PubMed Central journal article supplement (PMC6142268)
Supplement: pnas.1801862115.sd02.pdf [file pnas.1801862115.sd02.pdf]

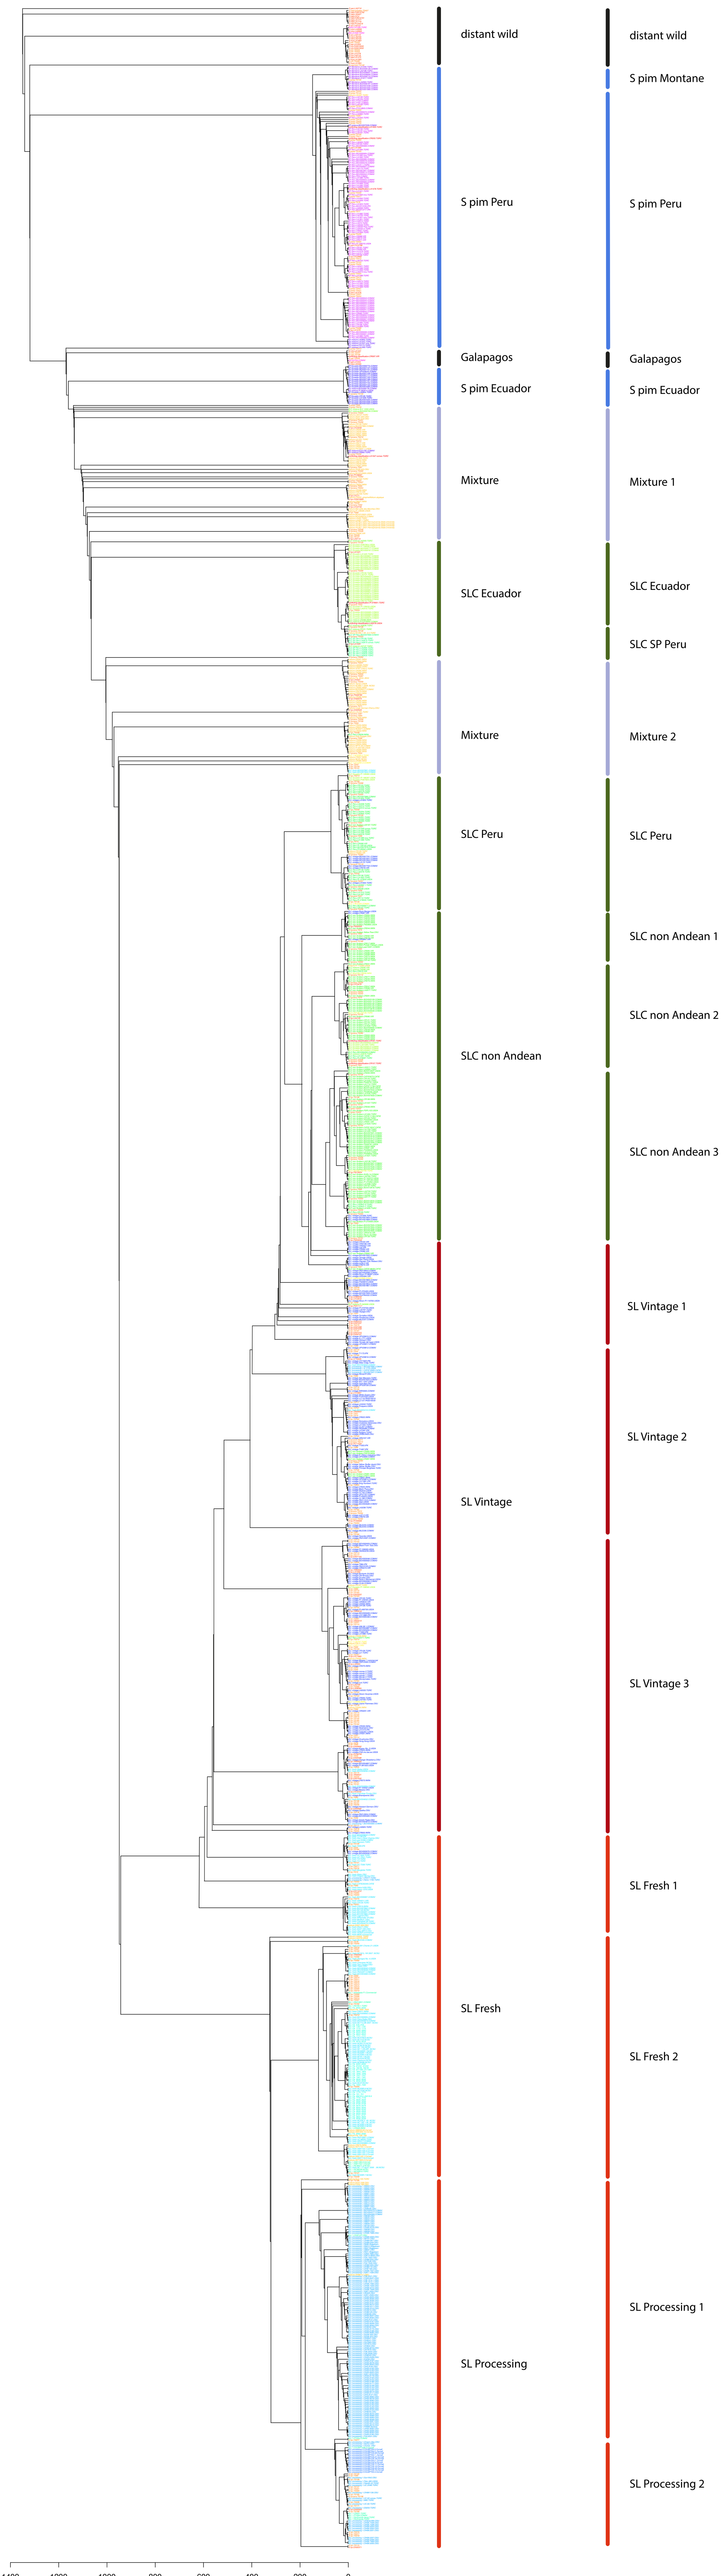

**Dataset S2**  
 Neighbour joining tree constructed for 1412 accessions represented in Blanca et al. 2015, Lin et al. 2014 or Alfaro et al. 2014. The tree is built with genotypes at 1956 genome-wide positions. Accessions published in Blanca et al. 2015 are named with the phylogenetic group assigned in the publication, the accession id and the seed bank where the seed was obtained. These accessions are coloured according to the phylogenetic group described in Blanca et al. 2015. Accessions re-sequenced in Alfaro et al. 2014 are coloured in red and are named after the tomato species described in the publication and the accession id. Accessions re-sequenced in Lin et al. 2014 are coloured in orange and are named after the tomato group (*S. pimpinellifolium*, *S. lycopersicum* var *cerasiforme* or *S. lycopersicum* var *lycopersicum*) described in the publication and the accession id. Vertical bars represent the groups and subgroups defined in the present article. Details for each accession are presented in Dataset S3.  
[www.pnas.org/cgi/doi/10.1073/pnas.1801862115](http://www.pnas.org/cgi/doi/10.1073/pnas.1801862115)
